# Supplementary material
Source: PubMed Central journal article supplement (PMC2918281)
Supplement: NIHMS221688-supplement-01.pdf [file NIHMS221688-supplement-01.pdf]

Type of file: figure

Label: 8

Filename: Supplemental Figure 1.ppt

## Supplemental Figure 1.

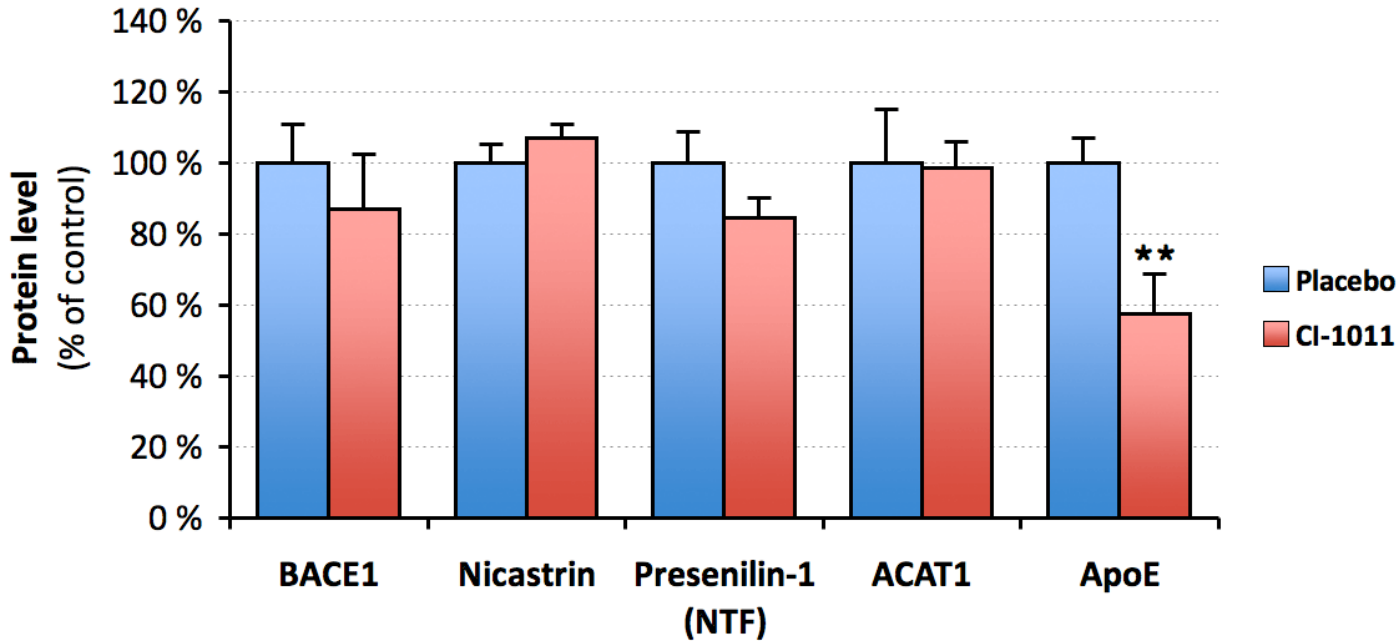

Quantitation of protein levels from Figure 4A. Protein levels (BACE1, nicastrin, presenilin-1 N-terminal fragment (NTF), ACAT1 and ApoE) were determined by densitometric analysis from Western blots and then normalized to  $\beta$ -tubulin levels. Analysis of APP-C99 and APP-C83 levels are shown in Fig. 4B. Each bar represents a mean  $\pm$  SD (n=4). \*\*, p<0.01.

Type of file: figure

Label: 9

Filename: Supplemental Figure 2.ppt

## Supplemental Figure 2.

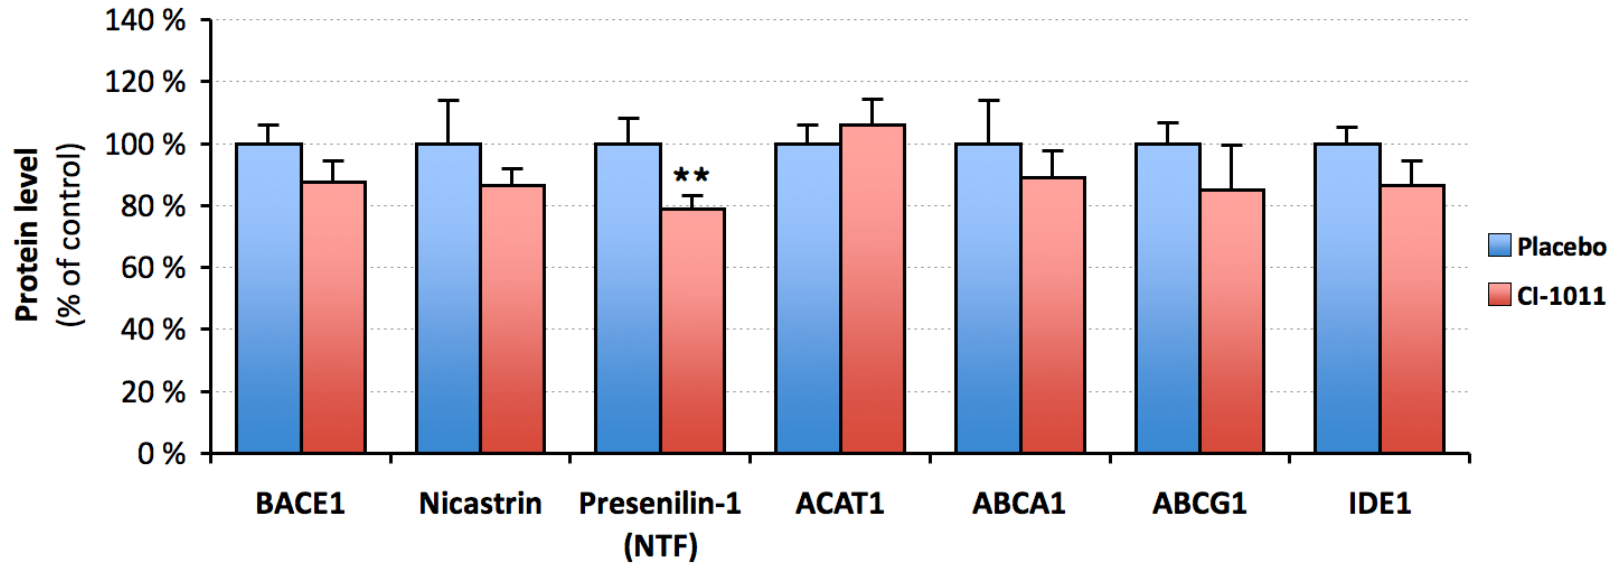

Quantitation of protein levels from Figure 6A. Protein levels (BACE1, nicastrin, presenilin-1 N-terminal fragment (NTF), ACAT1, ABCA1, ABCG1 and IDE1) were determined by densitometric analysis from Western blots and then normalized to  $\beta$ -tubulin levels. Analysis of APP-C99, APP-C83 and ApoE levels are shown in Fig. 6B-C. Each bar represents a mean  $\pm$  standard deviation (n=4). \*\*, p<0.01.

Type of file: table

Label: 1

Filename: Supplemental Table 1.doc

---

**Supplementary Table 1. Comparison of Efficacies of CI-1011 and CP-113,818 on Amyloid Pathology in 6.5-Month-Old hAPP Mice**

|                                                   | <b>CI-1011</b> | <b>CP-113,818*</b> |
|---------------------------------------------------|----------------|--------------------|
| Brain cholesteryl esters                          | -67%           | -86%               |
| Cortical plaque load                              | -54%           | -89%               |
| Hippocampal plaque load                           | -65%           | -99%               |
| Formic acid-extractable A $\beta$ <sub>1-40</sub> | -59%           | -96%               |
| Formic acid-extractable A $\beta$ <sub>1-42</sub> | -66%           | -90%               |

---

*\*CP-113,818 values are from Hutter-Paier et al Neuron 2004;44:227-238.*
